# Supplementary material for: Surface chemistry regulates the optical properties and cellular interactions of ultrasmall MoS2quantum dots for biomedical applications
Source: Royal Society of Chemistry journal article supplement (doi:10.1039/d1tb00647a), 2021-01-01
Supplement: d1tb00647a1.pdf [file d1tb00647a1.pdf]

**Surface chemistry regulates optical properties and cellular interactions of  
ultrasmall MoS<sub>2</sub> quantum dots for biomedical applications**

Kangqiang Liang<sup>a</sup>, Shaohua Qu<sup>a</sup>, Yixiao Li<sup>a</sup>, Li-li Tan<sup>a</sup>, Li Shang<sup>ab\*</sup>

<sup>a</sup> State Key Laboratory of Solidification Processing, Center for Nano Energy Materials, School of Materials Science and Engineering, Northwestern Polytechnical University and Shaanxi Joint Laboratory of Graphene (NPU), Xi'an, China

<sup>b</sup> NPU-QMUL Joint Research Institute of Advanced Materials and Structures (JRI-AMAS), Northwestern Polytechnical University, Xi'an, China

\* Corresponding authors, e-mail: li.shang@nwpu.edu.cn

## **Experimental**

### **The Cell Lysates**

The preparation of cell lysates was based on previous reports.<sup>1</sup> HeLa cells were lysed with a cold 3-[(3-cholamidopropyl) dimethylammonio]-1-propanesulfonate (CHAPS) lysis buffer (10 mM Tris-HCl, pH 7.4, 1 mM MgCl<sub>2</sub>, 1 mM EGTA, 0.1 mM PMSF, 0.5% CHAPS, and 10% glycerol) supplemented with 20 μM cetrimonium bromide at a density of  $1 \times 10^6$  cells/mL. The cell suspension was incubated for 30 min on ice, followed by centrifugation at 4 °C for 20 min to remove cell debris. The supernatant was flash frozen and stored at -20 °C before use.

## Supporting Figures

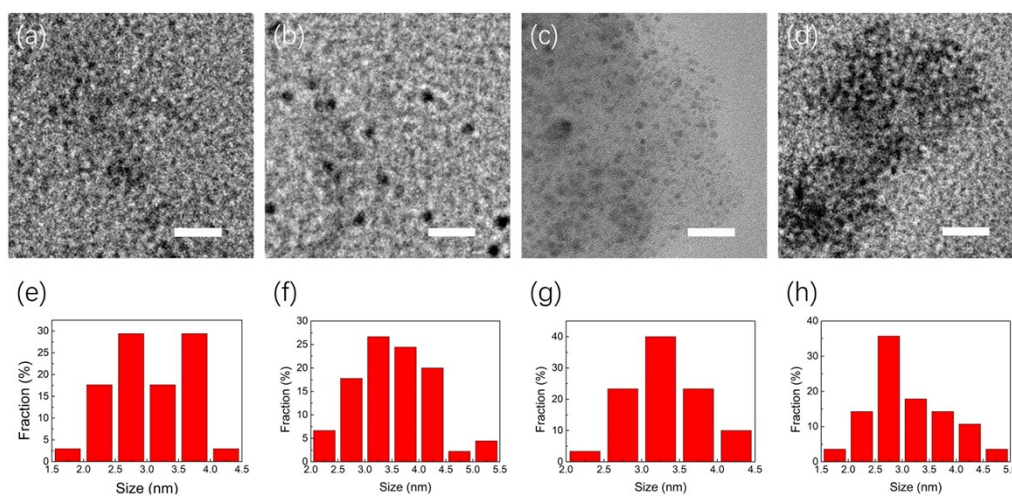

**Fig. S1** TEM (a-d) and corresponding size distribution diagrams (e-h) of GSH-MoS<sub>2</sub> QDs (a, e); Cys-MoS<sub>2</sub> QDs (b, f); MSA-MoS<sub>2</sub> QDs (c, g) and TA-MoS<sub>2</sub> QDs (d, h), respectively. Scale bars: 20 nm.

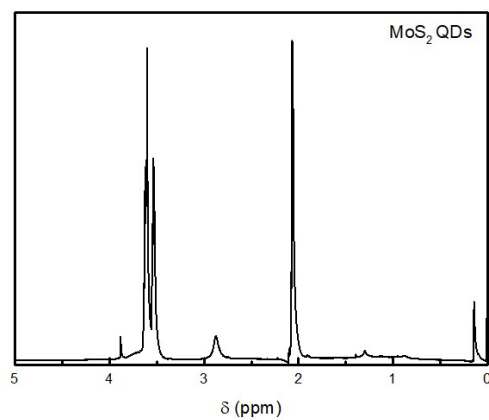

**Fig. S2** The <sup>1</sup>H-NMR spectrum of pristine MoS<sub>2</sub> QDs.

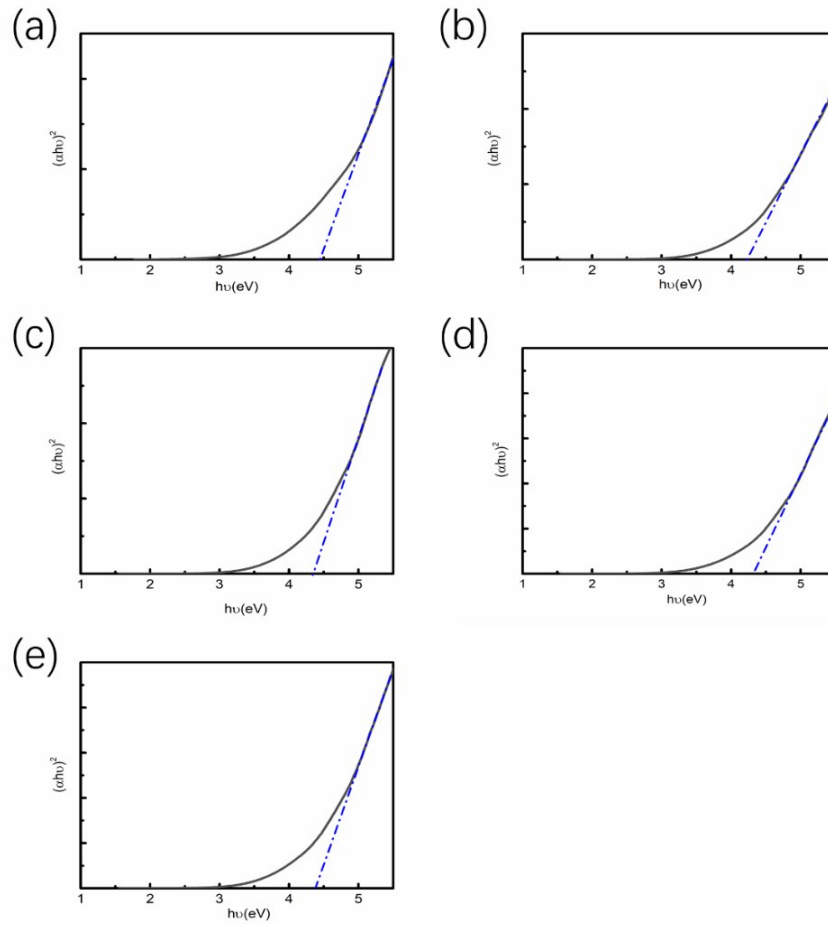

**Fig. S3** The Tauc-Plots of MoS<sub>2</sub> QDs and modified MoS<sub>2</sub> QDs. (a) Pristine MoS<sub>2</sub> QDs with band gap of 4.45 eV; (b) GSH-MoS<sub>2</sub> QDs with band gap of 4.23 eV; (c) Cys-MoS<sub>2</sub> QDs with band gap of 4.35 eV; (d) MSA-MoS<sub>2</sub> QDs with band gap of 4.32 eV; (e) TA-MoS<sub>2</sub> QDs with band gap of 4.38 eV. The band gap is estimated from the plot of  $(\alpha h\nu)^2$  versus  $h\nu$  by extrapolating the straight line to the X axis intercept (where  $\alpha$  is the absorbance and  $E=h\nu$  is the photonenergy).<sup>2-4</sup>

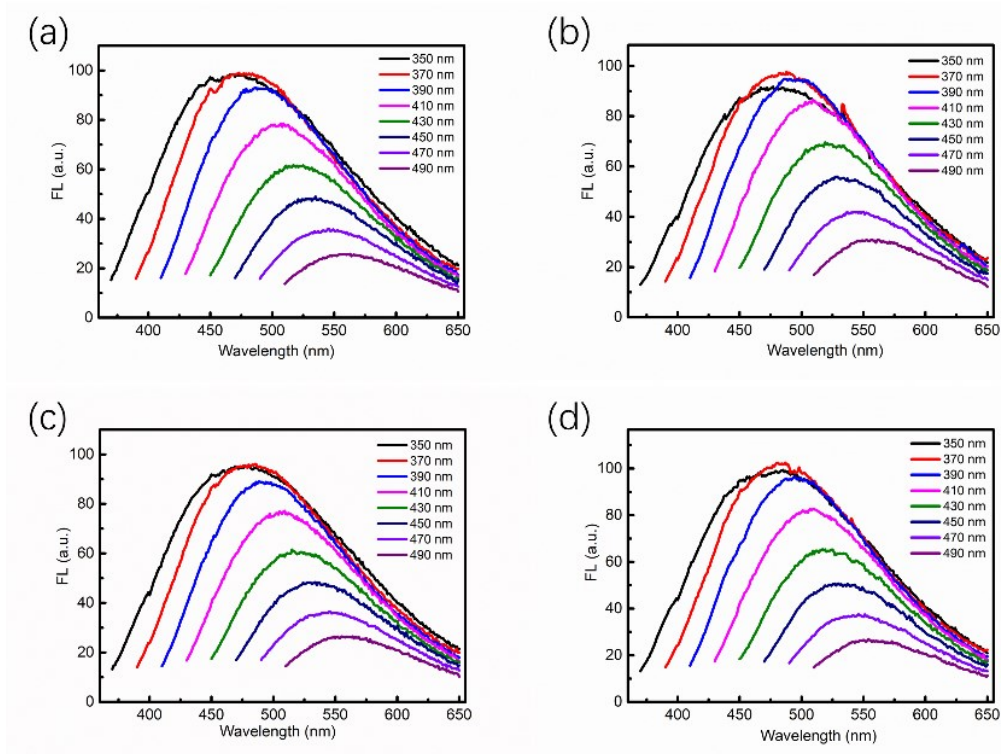

**Fig. S4** The fluorescence emission spectra of (a) GSH-MoS<sub>2</sub> QDs; (b) Cys-MoS<sub>2</sub> QDs; (c) MSA-MoS<sub>2</sub> QDs and (d) TA-MoS<sub>2</sub> QDs upon excitation at different wavelengths from 350 nm to 490 nm.

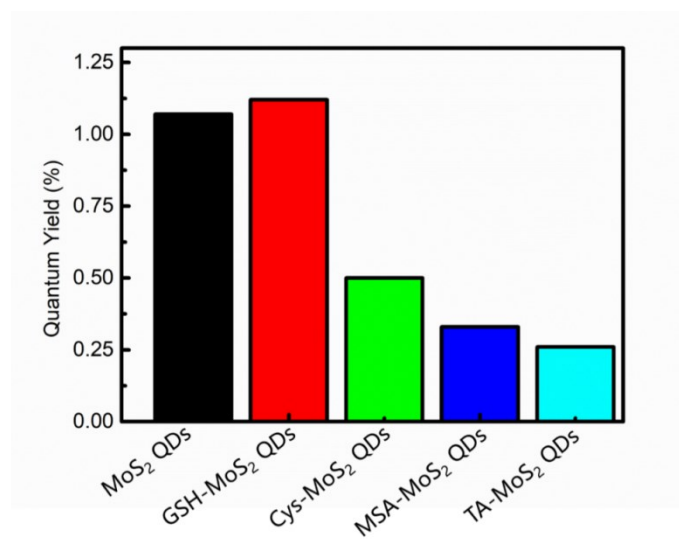

**Fig. S5** The quantum yield of pristine MoS<sub>2</sub> QDs and different modified MoS<sub>2</sub> QDs by using quinine sulfate as the reference.

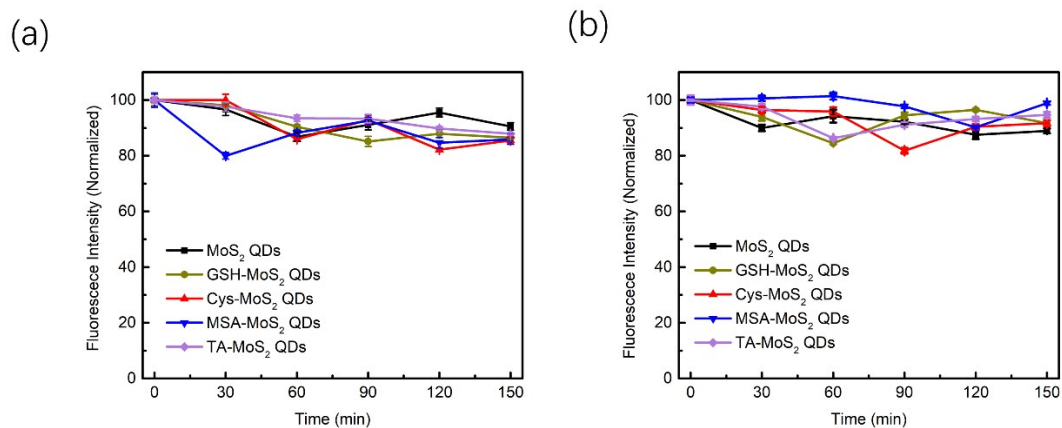

**Fig. S6** The colloidal stability of different MoS<sub>2</sub> QDs in (a) PBS and (b) cell lysates. The time-dependent fluorescence intensity of QDs, normalized by the original intensity at time zero, was recorded upon excitation at 405 nm.

## Reference

1. J. Deng, K. Wang, M. Wang, P. Yu, and L. Mao, *J. Am. Chem. Soc.*, 2017, **139**, 5877–5882.
2. X. Ren, Q. Wei, P. Ren, Y. Wang and Y. Peng, *Opt. Mater.*, 2018, **86**, 62-65.
3. Y. Feng, S. Lin, S. Huang, S. Shrestha and G. Conibeer, *J. Appl. Phys.*, 2015, **117**, 125701.
4. L. Najafi, B. Taheri, B. Martin-Garcia, S. Bellani, D. Di Girolamo, A. Agresti, R. Oropesa-Nunez, S. Pescetelli, L. Vesce, E. Calabro, M. Prato, A. E. Del Rio Castillo, A. Di Carlo and F. Bonaccorso, *ACS Nano*, 2018, **12**, 10736-10754.
